# Supplementary material for: Effects of culture-sensitive adaptation of patient information material on usefulness in migrants: a multicentre, blinded randomised controlled trial
Source: PubMed Central journal article supplement — BMJ Open. 2016 Nov 23;6(11):e012008. doi: 10.1136/bmjopen-2016-012008 (PMC5168496; doi:10.1136/bmjopen-2016-012008), 2016-11-23
Supplement: bmjopen-2016-012008supp.pdf [file bmjopen-2016-012008supp.pdf]

## Detailed results of the moderator analyses

0. Notes
1. Trial site
2. Migration background (language)
3. Illness
4. Migration background (language) \* Illness
5. Severity of depressive symptoms
6. Severity of back pain symptoms
7. Acculturation: Ethnic Society Immersion (ESI)
8. Acculturation: Dominant Society Immersion (DSI)
9. Acculturation: ESI \* DSI
10. Language & Acculturation

### 0. Notes

Variables for the moderator analyses have been pre-specified in the study protocol. The outcome was the subjectively assessed usefulness of the information material directly after consultation (primary outcome of the study). We used the same model as for the main analyses and introduced further covariates along with their interaction term with the group variable. For categorical covariates, we used the largest category as reference in order to maximize power. Metric covariates were centred. The last model (10) includes the covariates that turned out to be possibly relevant in the previous analyses (1-9).

## 1. Trial site

| Variable              | Estimate | SE   | p <sup>a</sup> |
|-----------------------|----------|------|----------------|
| intercept             | 60.90    | 2.34 | <.001          |
| group [C]             | Ref.     |      |                |
| group [I]             | 5.96     | 3.22 | .032           |
| time [T1]             | Ref.     |      |                |
| time [T2]             | -1.61    | 1.89 | .395           |
| time [T3]             | -1.44    | 1.93 | .456           |
| group [I] * time [T2] | -0.89    | 2.60 | .731           |
| group [I] * time [T3] | -3.44    | 2.67 | .197           |
| site [1]              | Ref.     |      |                |
| site [2]              | 1.54     | 3.72 | .679           |
| site [3]              | -1.19    | 6.21 | .848           |
| site [4]              | 2.93     | 3.38 | .386           |
| group [I] * site [2]  | -0.13    | 5.10 | .979           |
| group [I] * site [3]  | -7.19    | 8.60 | .403           |
| group [I] * site [4]  | -3.86    | 4.70 | .412           |

n=355

<sup>a</sup> one-sided p for group, two-sided p for other terms

C=control; I=intervention; SE=standard error; Ref.=reference category

Redundant interaction terms are not shown.

## 2. Migration background (language)

| Variable                   | Estimate | SE   | p <sup>a</sup> |
|----------------------------|----------|------|----------------|
| intercept                  | 64.10    | 1.98 | <.001          |
| group [C]                  | Ref.     |      |                |
| group [I]                  | 6.01     | 2.75 | .015           |
| time [T1]                  | Ref.     |      |                |
| time [T2]                  | -1.42    | 1.89 | .451           |
| time [T3]                  | -1.34    | 1.93 | .489           |
| group [I] * time [T2]      | -1.20    | 2.59 | .644           |
| group [I] * time [T3]      | -3.56    | 2.66 | .181           |
| language [RUS]             | Ref.     |      |                |
| language [TUR]             | -5.12    | 3.63 | .159           |
| language [POL]             | -4.70    | 4.87 | .335           |
| language [ITA]             | -9.65    | 5.18 | .064           |
| group [I] * language [TUR] | -2.54    | 5.17 | .623           |
| group [I] * language [POL] | -11.33   | 6.61 | .088           |
| group [I] * language [ITA] | 0.29     | 7.17 | .968           |

n=355

<sup>a</sup> one-sided p for group, two-sided p for other terms

C=control; I=intervention; SE=standard error; Ref.=reference category; RUS=Russian; TUR=Turkish; POL=Polish;

ITA=Italian

Redundant interaction terms are not shown.

### 3. Illness

| Variable                         | Estimate | SE   | p <sup>a</sup> |
|----------------------------------|----------|------|----------------|
| intercept                        | 63.20    | 2.10 | <.001          |
| group [C]                        | Ref.     |      |                |
| group [I]                        | 5.32     | 2.90 | .034           |
| time [T1]                        | Ref.     |      |                |
| time [T2]                        | -1.53    | 1.89 | .419           |
| time [T3]                        | -1.30    | 1.93 | .499           |
| group [I] * time [T2]            | -1.03    | 2.60 | .693           |
| group [I] * time [T3]            | -3.56    | 2.66 | .181           |
| illness [back pain]              | Ref.     |      |                |
| illness [depression]             | -2.89    | 2.83 | .308           |
| group [I] * illness [depression] | -2.21    | 3.94 | .576           |

n=355

<sup>a</sup> one-sided p for group, two-sided p for other terms

C=control; I=intervention; SE=standard error; Ref.=reference category

Redundant interaction terms are not shown.

### 4. Migration background (language) \* Illness

| Variable                               | Estimate | SE    | p <sup>a</sup> |
|----------------------------------------|----------|-------|----------------|
| intercept                              | 65.23    | 2.44  | <.001          |
| group [C]                              | Ref.     |       |                |
| group [I]                              | 5.57     | 3.38  | .050           |
| time [T1]                              | Ref.     |       |                |
| time [T2]                              | -1.50    | 1.89  | .427           |
| time [T3]                              | -1.38    | 1.93  | .474           |
| group [I] * time [T2]                  | -1.18    | 2.60  | .651           |
| group [I] * time [T3]                  | -3.56    | 2.66  | .181           |
| language [RUS]                         | Ref.     |       |                |
| language [TUR]                         | -6.35    | 4.90  | .195           |
| language [POL]                         | 3.97     | 6.93  | .567           |
| language [ITA]                         | -10.40   | 5.75  | .071           |
| group [I] * language [TUR]             | 1.82     | 6.95  | .793           |
| group [I] * language [POL]             | -11.99   | 8.97  | .182           |
| group [I] * language [ITA]             | 3.63     | 8.11  | .654           |
| illness [back pain]                    | Ref.     |       |                |
| illness [depression]                   | -2.54    | 3.42  | .459           |
| group [I] * illness [depression]       | 0.95     | 4.73  | .841           |
| language [TUR] * illness [depression]  | 2.82     | 7.20  | .696           |
| language [POL] * illness [depression]  | -15.99   | 9.65  | .099           |
| language [ITA] * illness [depression]  | 0.33     | 13.58 | .981           |
| gr [I] * lang [TUR] * ill [depression] | -9.38    | 10.26 | .361           |
| gr [I] * lang [POL] * ill [depression] | -4.29    | 13.22 | .746           |
| gr [I] * lang [ITA] * ill [depression] | -12.11   | 17.64 | .493           |

n=355

<sup>a</sup> one-sided p for group, two-sided p for other terms

C=control; I=intervention; SE=standard error; Ref.=reference category; RUS=Russian; TUR=Turkish; POL=Polish;

ITA=Italian

Redundant interaction terms are not shown.

## 5. Severity of depressive symptoms

| Variable                             | Estimate | SE   | p <sup>a</sup> |
|--------------------------------------|----------|------|----------------|
| intercept                            | 60.08    | 2.85 | <.001          |
| group [C]                            | Ref.     |      |                |
| group [I]                            | 3.50     | 3.96 | .189           |
| time [T1]                            | Ref.     |      |                |
| time [T2]                            | -0.86    | 3.12 | .781           |
| time [T3]                            | -1.19    | 3.17 | .707           |
| group [I] * time [T2]                | 0.03     | 4.33 | .995           |
| group [I] * time [T3]                | -6.17    | 4.47 | .168           |
| depression [PHQ-9 score]             | -0.27    | 0.27 | .306           |
| group [I] * depression [PHQ-9 score] | 0.21     | 0.37 | .576           |

n=146 (only cohort with depression)

The PHQ-9 score ranges from 0 (low severity) to 27 (high severity) and was centred at 12.64 for analysis.

<sup>a</sup> one-sided p for group, two-sided p for other terms

C=control; I=intervention; SE=standard error; Ref.=reference category

Redundant interaction terms are not shown.

## 6. Severity of back pain symptoms

| Variable                              | Estimate | SE   | p <sup>a</sup> |
|---------------------------------------|----------|------|----------------|
| intercept                             | 63.60    | 2.13 | <.001          |
| group [C]                             | Ref.     |      |                |
| group [I]                             | 5.20     | 2.96 | .040           |
| time [T1]                             | Ref.     |      |                |
| time [T2]                             | -2.57    | 2.35 | .275           |
| time [T3]                             | -1.80    | 2.41 | .454           |
| group [I] * time [T2]                 | -1.52    | 3.20 | .637           |
| group [I] * time [T3]                 | -1.53    | 3.27 | .640           |
| back pain [coreset score]             | -0.78    | 1.05 | .460           |
| group [I] * back pain [coreset score] | -1.13    | 1.44 | .433           |

n=209 (only cohort with back pain)

The coreset score ranges from 0 (low severity) to 10 (high severity) and was centred at 4.16 for analysis.

<sup>a</sup> one-sided p for group, two-sided p for other terms

C=control; I=intervention; SE=standard error; Ref.=reference category

Redundant interaction terms are not shown.

## 7. Acculturation: Ethnic Society Immersion (ESI)

| Variable                        | Estimate | SE   | p <sup>a</sup> |
|---------------------------------|----------|------|----------------|
| intercept                       | 62.10    | 1.74 | <.001          |
| group [C]                       | Ref.     |      |                |
| group [I]                       | 4.62     | 2.42 | .028           |
| time [T1]                       | Ref.     |      |                |
| time [T2]                       | -1.84    | 1.92 | .337           |
| time [T3]                       | -1.08    | 1.95 | .579           |
| group [I] * time [T2]           | -0.46    | 2.63 | .860           |
| group [I] * time [T3]           | -3.87    | 2.69 | .150           |
| acculturation [ESI]             | 9.14     | 4.66 | .050           |
| group [I] * acculturation [ESI] | -0.79    | 6.32 | .901           |

n=336

The ESI score ranges from 1 (low level) to 4 (high level) and was centred at 3.08 for analysis.

<sup>a</sup> one-sided p for group, two-sided p for other terms

C=control; I=intervention; SE=standard error; Ref.=reference category

Redundant interaction terms are not shown.

## 8. Acculturation: Dominant Society Immersion (DSI)

| Variable                        | Estimate | SE   | p <sup>a</sup> |
|---------------------------------|----------|------|----------------|
| intercept                       | 62.23    | 1.74 | <.001          |
| group [C]                       | Ref.     |      |                |
| group [I]                       | 4.65     | 2.41 | .027           |
| time [T1]                       | Ref.     |      |                |
| time [T2]                       | -1.80    | 1.92 | .350           |
| time [T3]                       | -1.15    | 1.96 | .556           |
| group [I] * time [T2]           | -0.05    | 2.63 | .847           |
| group [I] * time [T3]           | -3.70    | 2.69 | .169           |
| acculturation [DSI]             | 8.07     | 3.75 | .032           |
| group [I] * acculturation [DSI] | -14.69   | 5.20 | .005           |

n=336

The DSI score ranges from 1 (low level) to 4 (high level) and was centred at 2.86 for analysis.

<sup>a</sup> one-sided p for group, two-sided p for other terms

C=control; I=intervention; SE=standard error; Ref.=reference category

Redundant interaction terms are not shown.

## 9. Acculturation: ESI \* DSI

| Variable                                | Estimate | SE    | p <sup>a</sup> |
|-----------------------------------------|----------|-------|----------------|
| intercept                               | 61.64    | 1.87  | <.001          |
| group [C]                               | Ref.     |       |                |
| group [I]                               | 4.71     | 2.55  | .033           |
| time [T1]                               | Ref.     |       |                |
| time [T2]                               | -1.84    | 1.92  | .340           |
| time [T3]                               | -1.13    | 1.95  | .563           |
| group [I] * time [T2]                   | -0.51    | 2.63  | .846           |
| group [I] * time [T3]                   | -3.66    | 2.69  | .174           |
| acculturation [ESI]                     | 5.78     | 5.52  | .296           |
| acculturation [DSI]                     | 6.70     | 4.57  | .144           |
| accult [ESI] * accult [DSI]             | 9.94     | 11.68 | .395           |
| group [I] * acculturation [ESI]         | 7.39     | 7.18  | .304           |
| group [I] * acculturation [DSI]         | -18.66   | 6.05  | .002           |
| group [I] * accult [ESI] * accult [DSI] | 0.91     | 15.59 | .954           |

n=336

The ESI score ranges from 1 (low level) to 4 (high level) and was centred at 3.08 for analysis.

The DSI score ranges from 1 (low level) to 4 (high level) and was centred at 2.86 for analysis.

<sup>a</sup> one-sided p for group, two-sided p for other terms

C=control; I=intervention; SE=standard error; Ref.=reference category

Redundant interaction terms are not shown.

## 10. Language & Acculturation

| Variable                        | Estimate | SE   | p <sup>a</sup> |
|---------------------------------|----------|------|----------------|
| intercept                       | 64.38    | 2.00 | <.001          |
| group [C]                       | Ref.     |      |                |
| group [I]                       | 5.81     | 2.77 | .018           |
| time [T1]                       | Ref.     |      |                |
| time [T2]                       | -1.75    | 1.92 | .363           |
| time [T3]                       | -1.10    | 1.95 | .572           |
| group [I] * time [T2]           | -0.68    | 2.62 | .796           |
| group [I] * time [T3]           | -3.82    | 2.68 | .155           |
| language [RUS]                  | Ref.     |      |                |
| language [TUR]                  | -3.50    | 3.77 | .354           |
| language [POL]                  | -5.61    | 5.08 | .271           |
| language [ITA]                  | -12.88   | 5.44 | .018           |
| group [I] * language [TUR]      | -3.66    | 5.27 | .488           |
| group [I] * language [POL]      | -7.07    | 6.91 | .307           |
| group [I] * language [ITA]      | 3.01     | 7.43 | .686           |
| acculturation [ESI]             | 5.37     | 5.63 | .341           |
| acculturation [DSI]             | 6.63     | 4.46 | .138           |
| group [I] * acculturation [ESI] | 5.77     | 7.32 | .431           |
| group [I] * acculturation [DSI] | -14.80   | 5.98 | .014           |

n=355

<sup>a</sup> one-sided p for group, two-sided p for other terms

C=control; I=intervention; SE=standard error; Ref.=reference category; RUS=Russian; TUR=Turkish; POL=Polish; ITA=Italian

Redundant interaction terms are not shown.
